# Supplementary material
Source: PubMed Central journal article supplement (PMC2987015)
Supplement: ejhg200986x1.pdf [file ejhg200986x1.pdf]

**Supplementary Table 1 Detailed information of selected studies for analyses of phenotype and cancer risk**

| Author Name            | Year | Ethnicity        | Design <sup>a</sup> | Match <sup>b</sup> | Case/Control |      | Adjusted factors <sup>c</sup> |     |       |       |     |        |     |       |
|------------------------|------|------------------|---------------------|--------------------|--------------|------|-------------------------------|-----|-------|-------|-----|--------|-----|-------|
|                        |      |                  |                     |                    |              |      | age                           | fmc | smoke | drink | BMI | mutual | rev | other |
| <b>Prostate cancer</b> |      |                  |                     |                    |              |      |                               |     |       |       |     |        |     |       |
| Wolk                   | 1998 | Caucasian        | P-based             | Yes                | 210          | 224  | Yes                           | No  | No    | No    | Yes | Yes    | No  | No    |
| Chan                   | 1998 | Caucasian        | Nested              | Yes                | 152          | 152  | Yes                           | No  | Yes   | No    | Yes | Yes    | Yes | No    |
| Finne                  | 2000 | Caucasian        | H-based             | No                 | 176          | 486  | Yes                           | No  | No    | No    | Yes | Yes    | No  | No    |
| Stattin                | 2000 | Caucasian        | Nested              | Yes                | 149          | 298  | Yes                           | No  | Yes   | No    | Yes | Yes    | No  | No    |
| Harman                 | 2000 | Mixed            | Nested              | No                 | 72           | 203  | No                            | No  | No    | No    | No  | Yes    | No  | No    |
| Chokkalingam           | 2001 | Asian            | P-based             | Yes                | 128          | 306  | Yes                           | No  | No    | No    | No  | Yes    | Yes | No    |
| Lacey                  | 2001 | Caucasian        | H-based             | Yes                | 30           | 60   | No                            | No  | No    | No    | No  | Yes    | No  | No    |
| Chan                   | 2002 | Caucasian        | Nested              | Yes                | 530          | 534  | Yes                           | No  | Yes   | No    | No  | Yes    | No  | No    |
| Li                     | 2003 | Caucasian        | H-based             | Yes                | 408          | 437  | Yes                           | No  | No    | No    | No  | No     | No  | No    |
| Nam                    | 2003 | Mixed            | H-based             | No                 | 483          | 804  | Yes                           | Yes | No    | No    | No  | No     | No  | No    |
| Woodson                | 2003 | Caucasian        | Nested              | Yes                | 100          | 400  | Yes                           | No  | No    | No    | Yes | Yes    | No  | No    |
| Stattin                | 2004 | Caucasian        | Nested              | Yes                | 281          | 560  | No                            | No  | No    | No    | No  | Yes    | No  | No    |
| Oliver                 | 2004 | Mixed            | P-based             | Yes                | 176          | 324  | Yes                           | No  | Yes   | No    | No  | Yes    | No  | No    |
| Meyer                  | 2005 | Caucasian        | Nested              | Yes                | 100          | 400  | Yes                           | No  | Yes   | Yes   | Yes | No     | No  | No    |
| Platz                  | 2005 | Mixed            | Nested              | Yes                | 462          | 462  | Yes                           | No  | No    | No    | No  | Yes    | No  | No    |
| Chen                   | 2005 | Mixed            | H-based             | Yes                | 174          | 174  | Yes                           | No  | No    | No    | Yes | Yes    | No  | No    |
| Severi                 | 2006 | Caucasian        | Nested              | No                 | 524          | 1826 | Yes                           | No  | No    | Yes   | No  | No     | No  | Yes   |
| Hernandez              | 2007 | African American | H-based             | Yes                | 401          | 366  | Yes                           | No  | No    | No    | Yes | No     | No  | No    |
| Weiss                  | 2007 | Mixed            | Nested              | Yes                | 727          | 887  | Yes                           | No  | No    | No    | No  | Yes    | No  | No    |
| Allen                  | 2007 | Caucasian        | Nested              | Yes                | 630          | 630  | No                            | No  | No    | No    | No  | No     | No  | No    |
| Borugian_Asian         | 2008 | Asian            | Nested              | Yes                | 33           | 142  | Yes                           | No  | No    | No    | No  | No     | No  | No    |
| Borugian_white         | 2008 | Caucasian        | Nested              | Yes                | 34           | 150  | Yes                           | No  | No    | No    | No  | No     | No  | No    |

|                                     |      |                  |         |     |     |     |     |     |     |     |     |     |     |     |    |
|-------------------------------------|------|------------------|---------|-----|-----|-----|-----|-----|-----|-----|-----|-----|-----|-----|----|
| Borugian_black                      | 2008 | African American | Nested  | Yes | 29  | 124 | Yes | No  |    |
| <b>Premenopausal breast cancer</b>  |      |                  |         |     |     |     |     |     |     |     |     |     |     |     |    |
| Hankinson                           | 1998 | Caucasian        | Nested  | Yes | 76  | 105 | Yes | Yes | No  | No  | Yes | Yes | Yes | Yes |    |
| Del Giudice                         | 1998 | Mixed            | H-based | No  | 99  | 99  | Yes | No  | No  | No  | Yes | No  | No  | No  |    |
| Toniolo                             | 2000 | Caucasian        | Nested  | Yes | 172 | 486 | Yes | Yes | No  | No  | No  | Yes | Yes | Yes |    |
| Muti                                | 2002 | Caucasian        | Nested  | Yes | 69  | 267 | Yes | No  | No  | No  | Yes | Yes | Yes | Yes |    |
| Krajcik                             | 2002 | Caucasian        | Nested  | Yes | 66  | 66  | Yes | No  | No  | No  | No  | Yes | No  | Yes |    |
| Yu                                  | 2002 | Asian            | Nested  | Yes | 171 | 170 | Yes | Yes | No  | No  | Yes | Yes | Yes | Yes |    |
| Sanderson                           | 2004 | Asian            | P-based | Yes | 250 | 252 | Yes | No  | No  | No  | No  | No  | No  | Yes |    |
| Rinaldi                             | 2005 | Caucasian        | Nested  | Yes | 138 | 259 | Yes | No  | No  | No  | No  | Yes | No  | No  |    |
| Allen                               | 2005 | Caucasian        | Nested  | Yes | 70  | 209 | Yes | No  | No  | No  | Yes | Yes | No  | No  |    |
| Schernhammer                        | 2006 | Caucasian        | Nested  | Yes | 239 | 478 | Yes | Yes | No  | No  | Yes | Yes | Yes | Yes |    |
| Rollison                            | 2006 | Caucasian        | Nested  | Yes | 175 | 175 | Yes | No  | No  | No  | No  | Yes | No  | No  |    |
| <b>Postmenopausal breast cancer</b> |      |                  |         |     |     |     |     |     |     |     |     |     |     |     |    |
| Hankinson                           | 1998 | Caucasian        | Nested  | Yes | 305 | 483 | Yes | Yes | No  | No  | Yes | Yes | Yes | Yes |    |
| Toniolo                             | 2000 | Caucasian        | Nested  | Yes | 115 | 220 | Yes | Yes | No  | No  | No  | Yes | Yes | Yes |    |
| Muti                                | 2002 | Caucasian        | Nested  | Yes | 64  | 238 | Yes | No  | No  | No  | Yes | Yes | Yes | Yes |    |
| Krajcik                             | 2002 | Caucasian        | Nested  | Yes | 60  | 60  | Yes | No  | No  | No  | No  | Yes | No  | Yes |    |
| Yu                                  | 2002 | Asian            | Nested  | Yes | 128 | 130 | Yes | Yes | No  | No  | Yes | Yes | Yes | Yes |    |
| Sanderson                           | 2004 | Asian            | P-based | Yes | 147 | 145 | Yes | No  | No  | No  | No  | No  | No  | Yes |    |
| Schairer                            | 2004 | Caucasian        | H-based | Yes | 185 | 159 | Yes | No  | No  | No  | Yes | Yes | Yes | Yes |    |
| Allen                               | 2005 | Caucasian        | Nested  | Yes | 47  | 141 | Yes | No  | No  | No  | Yes | Yes | No  | No  |    |
| Rollison                            | 2006 | Caucasian        | Nested  | Yes | 91  | 91  | Yes | No  | No  | No  | No  | Yes | No  | No  |    |
| <b>Colorectal cancer</b>            |      |                  |         |     |     |     |     |     |     |     |     |     |     |     |    |
| Ma                                  | 1999 | Caucasian        | Nested  | Yes | 193 | 318 | Yes | No  | Yes | Yes | Yes | Yes | Yes | No  | No |
| Giovannucci                         | 2000 | Caucasian        | Nested  | Yes | 79  | 158 | No  | No  | No  | No  | Yes | Yes | Yes | Yes | No |

|                           |      |                             |         |     |     |     |     |     |     |     |     |     |     |     |  |
|---------------------------|------|-----------------------------|---------|-----|-----|-----|-----|-----|-----|-----|-----|-----|-----|-----|--|
| Kaaks                     | 2000 | Caucasian                   | Nested  | Yes | 102 | 200 | Yes | No  | Yes | No  | Yes | Yes | Yes | No  |  |
| Probst-Hensch             | 2001 | Asian                       | Nested  | Yes | 135 | 661 | Yes | No  | Yes | Yes | Yes | Yes | No  | No  |  |
| Ma                        | 2001 | Caucasian                   | Nested  | Yes | 193 | 318 | Yes | No  | Yes | Yes | Yes | Yes | No  | No  |  |
| Palmqvist                 | 2002 | Caucasian (Sweden)          | Nested  | Yes | 168 | 336 | Yes | No  | Yes | No  | Yes | Yes | Yes | No  |  |
| Nomura                    | 2003 | Asian(Japanese<br>American) | Nested  | Yes | 282 | 282 | Yes | No  | Yes | Yes | Yes | Yes | No  | No  |  |
| Wei                       | 2005 | Caucasian                   | Nested  | Yes | 137 | 262 | No  | Yes |  |
| Otani_men                 | 2007 | Asian                       | Nested  | Yes | 196 | 392 | Yes | Yes | Yes | Yes | Yes | Yes | No  | No  |  |
| Otani_women               | 2007 | Asian                       | Nested  | Yes | 179 | 358 | Yes | Yes | Yes | Yes | Yes | Yes | No  | No  |  |
| Gunter                    | 2008 | Caucasian                   | Nested  | No  | 438 | 816 | Yes | No  |  |
| <b>Endometrial cancer</b> |      |                             |         |     |     |     |     |     |     |     |     |     |     |     |  |
| Petridou                  | 2003 | Caucasian                   | H-based | Yes | 84  | 84  | Yes | No  | Yes | Yes | Yes | Yes | Yes | Yes |  |
| Augustin                  | 2004 | Caucasian                   | H-based | Yes | 73  | 108 | Yes | No  | No  | No  | Yes | No  | Yes | Yes |  |
| Lacey                     | 2004 | Mixed                       | P-based | Yes | 405 | 297 | Yes | No  | No  | No  | Yes | No  | No  | No  |  |
| Oh                        | 2004 | Mixed                       | H-based | Yes | 80  | 80  | No  | No  | No  | No  | Yes | No  | No  | No  |  |
| Lukanova                  | 2004 | Caucasian                   | Nested  | Yes | 166 | 315 | Yes | No  | No  | No  | Yes | No  | Yes | Yes |  |
| <b>Lung cancer</b>        |      |                             |         |     |     |     |     |     |     |     |     |     |     |     |  |
| Yu                        | 1999 | Mixed                       | H-based | Yes | 204 | 218 | Yes | Yes | Yes | No  | Yes | Yes | No  | Yes |  |
| Lukanova                  | 2001 | Caucasian                   | Nested  | Yes | 93  | 186 | Yes | No  | Yes | No  | Yes | Yes | Yes | Yes |  |
| London                    | 2001 | Asian                       | Nested  | Yes | 230 | 740 | Yes | No  | Yes | No  | No  | Yes | No  | No  |  |
| Spitz                     | 2002 | Caucasian                   | Nested  | Yes | 159 | 297 | Yes | No  | Yes | No  | Yes | Yes | No  | No  |  |
| Ahn                       | 2006 | Caucasian                   | Nested  | Yes | 200 | 400 | Yes | No  | Yes | No  | Yes | Yes | No  | No  |  |
| <b>Ovarian cancer</b>     |      |                             |         |     |     |     |     |     |     |     |     |     |     |     |  |
| Lukanova                  | 2002 | Mixed                       | Nested  | Yes | 132 | 263 | Yes | No  | No  | No  | Yes | Yes | Yes | Yes |  |
| Dal Maso                  | 2004 | Caucasian                   | H-based | Yes | 59  | 108 | Yes | No  | Yes | No  | No  | Yes | Yes | Yes |  |
| Peeters                   | 2007 | Caucasian                   | Nested  | Yes | 214 | 388 | Yes | No  | No  | No  | Yes | No  | Yes | No  |  |

|                           |      |           |         |     |      |      |     |    |     |     |     |     |     |     |
|---------------------------|------|-----------|---------|-----|------|------|-----|----|-----|-----|-----|-----|-----|-----|
| Tworoger                  | 2007 | Mixed     | Nested  | Yes | 222  | 599  | Yes | No | No  | No  | No  | No  | Yes | No  |
| <b>Pancreatic Cancer</b>  |      |           |         |     |      |      |     |    |     |     |     |     |     |     |
| Stolzenberg-Solomon       | 2004 | Caucasian | Nested  | No  | 93   | 400  | Yes | No | Yes | No  | Yes | Yes | No  | Yes |
| Lin                       | 2004 | Asian     | Nested  | Yes | 69   | 207  | No  | No | Yes | No  | Yes | Yes | No  | No  |
| Wolpin                    | 2007 | Mixed     | Nested  | Yes | 212  | 635  | Yes | No | Yes | No  | Yes | Yes | Yes | No  |
| <b>Other cancer types</b> |      |           |         |     |      |      |     |    |     |     |     |     |     |     |
| Zhao                      | 2003 | Caucasian | H-based | Yes | 154  | 154  | Yes | No | Yes | No  | No  | Yes | No  | No  |
| Serrano                   | 2006 | Mixed     | H-based | Yes | 41   | 74   | No  | No | Yes | No  | No  | Yes | Yes | No  |
| Morris                    | 2006 | European  | Nested  | Yes | 1051 | 3142 | Yes | No | Yes | Yes | Yes | Yes | No  | No  |
| Schaffer                  | 2007 | Mixed     | H-based | Yes | 329  | 621  | Yes | No | No  | No  | No  | Yes | Yes | No  |
| Pham                      | 2007 | Asian     | Nested  | Yes | 161  | 314  | Yes | No | Yes | No  | Yes | No  | No  | Yes |

<sup>a</sup>Design=study design, nested=nested case-control study; P-based=population-based case-control study; H-based=hospital based case-control study

<sup>b</sup>Matched=the situation of matched design

<sup>c</sup>Adjusted factors: fmc=family history of cancer; mutual=mutual adjustment of IGF1 (or IGFBP3), rev=sex hormones, hormone replacement therapy, with or without reproductive, others=area, economic and education status and so on.
