# Supplementary material
Source: PubMed Central journal article supplement (PMC2987015)
Supplement: ejhg200986x2.pdf [file ejhg200986x2.pdf]

**Supplementary Table 2 Detailed information of selected studies for genotypes and cancer risk**

| Author name                           | Study design | Cancer        | Matched | Study Loci <sup>a</sup> | Ethnic group                        | Study case/control number          |                      |                  |                        |     |
|---------------------------------------|--------------|---------------|---------|-------------------------|-------------------------------------|------------------------------------|----------------------|------------------|------------------------|-----|
|                                       |              |               |         |                         |                                     | <i>IGF1</i> (CA)n:<br>case/control | <i>IGFBP3</i> A-202C |                  | <i>IGFBP3</i> Gly32Ala |     |
|                                       |              |               |         |                         |                                     |                                    | Case/control         | HWE <sup>b</sup> | Case/control           | HWE |
| Yu, 2001                              | H-based C/C  | Breast cancer | Yes     | 1                       | Mixed (US)                          | 53/53                              | NA                   | NA               | NA                     | NA  |
| Missmer, 2002                         | Nested C/C   | Breast cancer | Yes     | 1                       | Caucasian                           | 463/622                            | NA                   | NA               | NA                     | NA  |
| DeLellis, 2003                        | Nested C/C   | Breast cancer | Yes     | 1                       | Mixed (US)                          | 320/373                            | NA                   | NA               | NA                     | NA  |
| Rohrbacher , 2003                     | Nested C/C   | Breast cancer | Yes     | 2                       | Caucasian                           | NA                                 | 603/1068             | Yes              | NA                     | NA  |
| Ren, 2004                             | P-based C/C  | Breast cancer | Yes     | 2 and 3                 | Asian (Chinese)                     | NA                                 | 1109/1207            | No               | 1107/1211              | No  |
| Wagner, 2005 <sup>c</sup>             | H-based C/C  | Breast cancer | Yes     | 1 and 2                 | European( Finish and Polish)        | 507/687                            | 305/342              | Yes              | NA                     | NA  |
| Wen, 2005                             | P-based C/C  | Breast cancer | Yes     | 1                       | Asian (Chinese)                     | 1041/1086                          | NA                   | NA               | NA                     | NA  |
| Cleveland, 2006                       | P-based C/C  | Breast cancer | Yes     | 1                       | Caucasian                           | 1004/1042                          | NA                   | NA               | NA                     | NA  |
| Al-Zahrani, 2006                      | P-based C/C  | Breast cancer | Yes     | 2                       | European (UK)                       | NA                                 | 4311/4449            | Yes              | NA                     | NA  |
| Canzian, 2006                         | P-based C/C  | Breast cancer | Yes     | 1                       | European (Western European country) | NA                                 | 776/1519             | Yes              | NA                     | NA  |
| Ladd, 2007                            | Cohort study | Breast cancer | Yes     | 1                       | Caucasian                           | 203/3978                           | NA                   | NA               | NA                     | NA  |
| Cox_ABCFS_KConFaB <sup>d</sup> , 2007 | H-based C/C  | Breast cancer | Yes     | 2                       | Caucasian                           | NA                                 | 1439/615             | Yes              | NA                     | NA  |
| Cox_Copenhagen <sup>d</sup> , 2007    | P-based C/C  | Breast cancer | Yes     | 2                       | Caucasian                           | NA                                 | 1265/5741            | No               | NA                     | NA  |
| Cox_GENICA <sup>d</sup> , 2007        | P-based C/C  | Breast cancer | Yes     | 2                       | Caucasian                           | NA                                 | 590/618              | Yes              | NA                     | NA  |
| Cox_GESBC <sup>d</sup> , 2007         | P-based C/C  | Breast cancer | Yes     | 2                       | Caucasian                           | NA                                 | 629/1090             | Yes              | NA                     | NA  |

|                                   |             |                   |     |            |                             |           |           |     |          |     |
|-----------------------------------|-------------|-------------------|-----|------------|-----------------------------|-----------|-----------|-----|----------|-----|
| Cox_IARC_THAI <sup>d</sup> , 2007 | H-based C/C | Breast cancer     | Yes | 2          | Asian                       | NA        | 378/333   | Yes | NA       | NA  |
| Cox_Kuopio <sup>d</sup> , 2007    | H-based C/C | Breast cancer     | Yes | 2          | Caucasian                   | NA        | 443/400   | Yes | NA       | NA  |
| Cox_PBCS <sup>d</sup> , 2007      | P-based C/C | Breast cancer     | Yes | 2          | Caucasian                   | NA        | 2028/2311 | No  | NA       | NA  |
| Cox_SEARCH <sup>d</sup> , 2007    | P-based C/C | Breast cancer     | Yes | 2          | Caucasian                   | NA        | 4203/4449 | Yes | NA       | NA  |
| Cox_SASBAC <sup>d</sup> , 2007    | P-based C/C | Breast cancer     | Yes | 2          | Caucasian                   | NA        | 1422/1351 | Yes | NA       | NA  |
| Cox_USRT <sup>d</sup> , 2007      | Nested C/C  | Breast cancer     | Yes | 2          | Mixed                       | NA        | 704/1018  | Yes | NA       | NA  |
| Slattery, 2004                    | P-based C/C | Colorectal cancer | Yes | 1 and 2    | Mixed (US)                  | 1947/2156 | 1948/2152 | Yes | NA       | NA  |
| Wong, 2005                        | Nested C/C  | Colorectal cancer | Yes | 1 and 2    | Asian(Singapore Chinese)    | 290/873   | 272/821   | Yes | NA       | NA  |
| Morimoto, 2005                    | P-based C/C | Colorectal cancer | Yes | 1 and 3    | Caucasian                   | 782/503   | NA        | NA  | 782/503  | Yes |
| Marchand, 2005                    | Nested C/C  | Colorectal cancer | Yes | 3          | Mixed (US)                  | NA        | NA        | NA  | 817/1995 | No  |
| Pechlivanis, 2007                 | P-based C/C | Colorectal cancer | Yes | 1, 2 and 3 | Caucasian                   | 653/593   | 614/547   | Yes | 606/550  | No  |
| Wang, 2003                        | H-based C/C | Prostate cancer   | Yes | 2          | Asian (Japanese)            | NA        | 307/272   | Yes | NA       | NA  |
| Nam, 2003                         | H-based C/C | Prostate cancer   | Yes | 1 and 2    | Mixed                       | 483/548   | 483/548   | Yes | NA       | NA  |
| Li, 2004                          | H-based C/C | Prostate cancer   | Yes | 1 and 2    | Mixed (US)                  | 440/479   | 440/479   | Yes | NA       | NA  |
| Schildkraut, 2005                 | H-based C/C | Prostate cancer   | Yes | 1 and 2    | Mixed (White and Black, US) | 94/81     | 97/88     | Yes | NA       | NA  |
| Friedrichsen, 2005                | P-based C/C | Prostate cancer   | Yes | 1 and 3    | Caucasian                   | 581/520   | NA        | NA  | 587/537  | Yes |
| Tsychiya, 2005                    | H-based C/C | Prostate cancer   | Yes | 1          | Asian (Japanese)            | 303/262   | NA        | NA  | NA       | NA  |
| Chen, 2006                        | Nested C/C  | Prostate cancer   | Yes | 1 and 2    | Mixed (US)                  | 213/213   | 213/213   | Yes | NA       | NA  |
| Moon, 2006                        | H-based C/C | Lung cancer       | Yes | 2          | Asian (Korea)               | NA        | 209/209   | Yes | NA       | NA  |
| Hoyo, 2007                        | P-base C/C  | Prostate cancer   | Yes | 1 and 2    | Mixed(White and             | 94/84     | 97/92     | NA  | NA       | NA  |

|                 |             |                 |     |           |                  |         |         |     |         |     |
|-----------------|-------------|-----------------|-----|-----------|------------------|---------|---------|-----|---------|-----|
|                 |             |                 |     |           | Black, US)       |         |         |     |         |     |
| Hernandez, 2007 | H-based C/C | Prostate cancer | Yes | 1,2 and 3 | African American | 401/366 | 401/366 | Yes | NA      | NA  |
| Chen, 2008      | H-based C/C | Gastric cancer  | Yes | 2 and 3   | Asian(Chinese)   | NA      | 576/647 | Yes | 576/647 | Yes |

<sup>a</sup>Study loci: 1=IGF1 CA repeat; 2=IGFBP3 A-202C;3=IGFBP3 Gly32Ala.

<sup>b</sup> Hardy–Weinberg equilibrium (HWE),  $df = 1$ .

<sup>c</sup>Some overlapped cases and control were neglected, for IGF1: 507 cases and 687 controls remained (without regard to age<50 in Polish); for IGFBP3: 305 cases and 342 control left (only Finnish and Swish).

<sup>d</sup>A multi-centre plan was divided into ten sub-studies (Cox et al, 2007).
