# Supplementary material
Source: PubMed Central journal article supplement (PMC2987015)
Supplement: ejhg200986x3.pdf [file ejhg200986x3.pdf]

**Supplementary Table 3 Detailed information of selected studies for the analyses of phenotype and cancer risk**

| Author Name            | Year | Blood Sample | Assay methods | Category | IGF1 |       |       | IGFBP3 |       |       | IGF molar ratio |       |       |
|------------------------|------|--------------|---------------|----------|------|-------|-------|--------|-------|-------|-----------------|-------|-------|
|                        |      |              |               |          | OR   | lower | upper | OR     | lower | upper | OR              | lower | upper |
| <b>prostate cancer</b> |      |              |               |          |      |       |       |        |       |       |                 |       |       |
| Wolk                   | 1998 | SS           | IMRA          | Q4,Q4,NA | 1.43 | 0.88  | 2.33  | -      | -     | -     | -               | -     | -     |
| Chan                   | 1998 | PS           | ELISA         | Q4,Q4,NA | 4.32 | 1.76  | 10.6  | 0.41   | 0.17  | 1.03  | -               | -     | -     |
| Finne                  | 2000 | SS           | ELISA         | Q4,NA,NA | 0.57 | 0.28  | 1.16  | -      | -     | -     | -               | -     | -     |
| Harman                 | 2000 | SS           | RIA           | Q3,Q3,NA | 3.11 | 1.11  | 8.74  | 0.76   | 0.3   | 1.94  | -               | -     | -     |
| Stattin                | 2000 | PS           | ELISA         | Q4,Q4,NA | 1.32 | 0.73  | 2.39  | 1.19   | 0.66  | 2.15  | -               | -     | -     |
| Chokkalingam           | 2001 | PS           | ELISA         | Q4,Q4,Q4 | 3.92 | 1.58  | 9.7   | 0.47   | 0.21  | 1.05  | 3.58            | 1.74  | 7.35  |
| Lacey                  | 2001 | SS           | ELISA         | Q4,Q4,NA | 0.6  | 0.1   | 2.9   | 1.1    | 0.3   | 3.8   | -               | -     | -     |
| Li                     | 2003 | SS           | ELISA         | Q4,Q4,Q4 | 1.04 | 0.64  | 1.68  | 1.1    | 0.67  | 1.79  | 1.62            | 1.02  | 2.57  |
| Woodson                | 2003 | SS           | ELISA         | Q4,Q4,Q4 | 0.52 | 0.23  | 1.16  | 1.93   | 0.83  | 4.49  | 0.54            | 0.29  | 1.01  |
| Nam                    | 2003 | SS           | ELISA         | Q4,Q4,NA | 0.67 | 0.5   | 0.9   | 1.27   | 0.9   | 1.2   | -               | -     | -     |
| Oliver                 | 2004 | SS           | ELISA         | Q3,Q3,Q3 | 3    | 1.5   | 6.01  | 0.58   | 0.29  | 1.15  | 1.62            | 0.87  | 2.99  |
| Stattin                | 2004 | PS           | IMRA          | Q4,Q4,NA | 1.47 | 0.81  | 2.64  | 1.04   | 0.63  | 1.74  | -               | -     | -     |
| Meyer                  | 2005 | SS           | CLIA          | Q4,Q4,NA | 1.8  | 0.76  | 4.27  | 0.4    | 0.1   | 1.6   | -               | -     | -     |
| Chen                   | 2005 | SS and PS    | IMRA          | Q4,Q4,Q4 | 0.77 | 0.33  | 1.84  | 0.63   | 0.29  | 1.37  | 0.75            | 0.41  | 1.36  |
| Platz                  | 2005 | PS           | ELISA         | Q4,Q4,Q4 | 1.17 | 0.69  | 1.99  | 1.4    | 0.8   | 2.44  | 1.02            | 0.68  | 1.51  |
| Severi                 | 2006 | PS           | ELISA         | Q4,Q4,Q4 | 1.07 | 0.79  | 1.46  | 1.49   | 1.11  | 1.2   | 0.82            | 0.61  | 1.11  |
| Hernandez              | 2007 | SS           | ICMA          | Q4,Q4,NA | 0.67 | 0.29  | 1.5   | 0.83   | 0.37  | 1.88  | -               | -     | -     |
| Allen                  | 2007 | SS           | ELISA         | Q3,Q3,NA | 1.39 | 1.02  | 1.89  | 1.01   | 0.74  | 1.37  | -               | -     | -     |
| Weiss                  | 2007 | SS           | ELISA         | Q4,Q4,Q4 | 1.12 | 0.79  | 1.6   | 1.1    | 0.76  | 1.59  | 1.13            | 0.86  | 1.49  |
| Borugian_black         | 2008 | SS           | ELISA         | Q4,Q4,Q4 | 1.09 | 0.34  | 3.49  | 1.01   | 0.15  | 6.59  | 1.12            | 0.39  | 3.63  |
| Borugian_white         | 2008 | SS           | ELISA         | Q4,Q4,Q4 | 1.16 | 0.35  | 3.83  | 1.7    | 0.57  | 5.07  | 1.41            | 0.55  | 3.61  |
| Borugian_Asian         | 2008 | SS           | ELISA         | Q4,Q4,Q4 | 1.65 | 0.58  | 4.71  | 0.69   | 0.18  | 2.63  | 2.67            | 0.83  | 8.6   |

---

**premenopausal breast cancer**

|              |      |           |          |           |      |      |      |      |      |      |      |      |      |
|--------------|------|-----------|----------|-----------|------|------|------|------|------|------|------|------|------|
| Hankinson    | 1998 | PS        | ELISA    | Q3,NA,NA  | 2.88 | 1.21 | 6.85 | -    | -    | -    | -    | -    | -    |
| Del Giudice  | 1998 | PS        | RIA      | Q5,Q5,NA  | 1.47 | 0.66 | 3.27 | 2.05 | 0.93 | 2.53 | -    | -    | -    |
| Toniolo      | 2000 | SS        | RIA      | Q4,Q4,NA  | 1.6  | 0.91 | 2.81 | 1.18 | 0.66 | 2.08 | -    | -    | -    |
| Muti         | 2002 | SS        | IMRA     | Q4, Q4,NA | 3.12 | 1.13 | 8.6  | 2.31 | 0.97 | 5.53 | -    | -    | -    |
| Yu           | 2002 | PS        | RIA,IRMA | Q3,Q3,NA  | 1.92 | 0.88 | 4.2  | 2.69 | 1.12 | 6.47 | -    | -    | -    |
| Krajcik      | 2002 | SS        | ELISA    | Q4,Q4,NA  | 2.01 | 0.33 | 12.4 | 5.28 | 1.13 | 24.7 | -    | -    | -    |
| Sanderson    | 2004 | PS        | ELISA    | Q3,Q3,NA  | 1.7  | 0.9  | 3.2  | 1.6  | 0.9  | 2.9  | -    | -    | -    |
| Allen        | 2005 | SS        | ELISA    | Q3,Q3,NA  | 1.71 | 0.74 | 3.95 | 0.49 | 0.21 | 1.12 | -    | -    | -    |
| Rinaldi      | 2005 | SS        | ELISA    | Q4,Q4,Q4  | 1.56 | 0.68 | 3.59 | 1.49 | 0.69 | 3.23 | 1.17 | 0.59 | 2.33 |
| Rollison     | 2006 | SS and PS | ELISA    | Q3,Q3,NA  | 1.6  | 0.85 | 3.02 | 0.69 | 0.36 | 1.34 | -    | -    | -    |
| Schernhammer | 2006 | PS        | ELISA    | Q4, Q4,NA | 0.92 | 0.61 | 1.41 | 1.23 | 0.83 | 1.82 | -    | -    | -    |

**postmenopausal breast cancer**

|           |      |           |          |           |      |      |      |      |      |      |     |     |     |
|-----------|------|-----------|----------|-----------|------|------|------|------|------|------|-----|-----|-----|
| Hankinson | 1998 | PS        | ELISA    | Q5,NA,NA  | 0.89 | 0.51 | 1.55 | -    | -    | -    | -   | -   | -   |
| Toniolo   | 2000 | SS        | RIA      | Q4,Q4,NA  | 0.95 | 0.49 | 1.86 | 1.08 | 0.54 | 2.16 | -   | -   | -   |
| Krajcik   | 2002 | SS        | RIA,IRMA | Q4,Q4,NA  | 1.22 | 0.21 | 6.78 | 0.32 | 0.07 | 1.41 | -   | -   | -   |
| Muti      | 2002 | SS        | IRMA     | Q4, Q4,NA | 0.58 | 0.24 | 1.36 | 0.73 | 0.3  | 1.74 | -   | -   | -   |
| Yu        | 2002 | PS        | ELISA    | Q3,Q3,NA  | 1.56 | 0.68 | 3.57 | 2.11 | 0.76 | 5.87 | -   | -   | -   |
| Schairer  | 2004 | SS        | ELISA    | Q4,Q4,Q4  | 0.9  | 0.4  | 2    | 1.2  | 0.6  | 2.8  | 0.9 | 0.5 | 1.9 |
| Sanderson | 2004 | PS        | ELISA    | Q3,Q3,NA  | 2.2  | 0.8  | 5.8  | 8.1  | 2.5  | 26   | -   | -   | -   |
| Allen     | 2005 | SS        | ELISA    | Q3,Q3,NA  | 0.73 | 0.29 | 1.84 | 1.14 | 0.4  | 3.23 | -   | -   | -   |
| Rollison  | 2006 | SS and PS | ELISA    | Q3,Q3,NA  | 1.55 | 0.61 | 3.94 | 1.17 | 0.48 | 2.84 | -   | -   | -   |

**colorectal cancer**

|             |      |    |       |          |      |      |      |      |      |      |   |   |   |
|-------------|------|----|-------|----------|------|------|------|------|------|------|---|---|---|
| Ma          | 1999 | PS | ELISA | Q5,Q5,NA | 2.51 | 1.15 | 5.46 | 0.28 | 0.12 | 0.66 | - | - | - |
| Giovannucci | 2000 | PS | ELISA | Q3,Q3,NA | 2.18 | 0.94 | 5.08 | 0.28 | 0.1  | 0.83 | - | - | - |
| Kaaks       | 2000 | SS | IRMA  | Q5,Q5,NA | 1.23 | 0.47 | 3.32 | 1.23 | 0.51 | 2.95 | - | - | - |

---

|                           |      |           |           |           |      |      |      |      |      |      |      |      |      |
|---------------------------|------|-----------|-----------|-----------|------|------|------|------|------|------|------|------|------|
| Ma                        | 2001 | PS        | ELISA     | NA,NA,Q3  | -    | -    | -    | -    | -    | -    | 1.84 | 1.12 | 3.01 |
| Probst-Hensch             | 2001 | SS        | RIA,IRMA  | Q5,Q5,Q5  | 1.18 | 0.55 | 2.53 | 1.78 | 0.86 | 3.7  | 0.96 | 0.48 | 1.89 |
| Palmqvist                 | 2002 | PS        | IRMA      | Q4,Q4,NA  | 1.27 | 0.65 | 2.47 | 1.23 | 0.68 | 2.22 | -    | -    | -    |
| Nomura                    | 2003 | SS        | ELISA     | Q4, Q4,NA | 1.5  | 0.8  | 2.8  | 0.8  | 0.4  | 1.6  | -    | -    | -    |
| Wei                       | 2005 | PS        | ELISA     | Q4,Q4,Q4  | 2.17 | 0.96 | 4.88 | 0.81 | 0.38 | 1.75 | 2.82 | 1.35 | 5.88 |
| Otani_women               | 2007 | PS        | IRMA,IRMA | Q4,Q4,NA  | 0.83 | 0.38 | 1.8  | 1.1  | 0.53 | 2.3  | -    | -    | -    |
| Otani_men                 | 2007 | PS        | IRMA      | Q4,Q4,NA  | 0.83 | 0.4  | 1.7  | 1.4  | 0.65 | 2.8  | -    | -    | -    |
| Gunter                    | 2008 | SS        | ELISA     | Q4, Q4,NA | 1.04 | 0.74 | 1.46 | 0.98 | 0.7  | 1.37 | -    | -    | -    |
| <b>ovarian cancer</b>     |      |           |           |           |      |      |      |      |      |      |      |      |      |
| Lukanova_before55         | 2002 | SS and PS | ELISA     | Q3,Q3,NA  | 4.98 | 1.21 | 20.6 | 0.87 | 0.23 | 3.25 | -    | -    | -    |
| Lukanova_after55          | 2002 | SS and PS | ELISA     | Q3,Q3,NA  | 0.94 | 0.41 | 2.18 | 1.09 | 0.46 | 2.62 | -    | -    | -    |
| Dal Maso                  | 2004 | PS        | ELISA     | Q3,Q3,NA  | 0.44 | 0.13 | 1.46 | 0.15 | 0.04 | 0.55 | -    | -    | -    |
| Tworoger                  | 2007 | PS        | ELISA     | Q4,Q4,Q4  | 0.51 | 0.26 | 1.01 | 1.07 | 0.57 | 2.03 | -    | -    | -    |
| Peeters                   | 2007 | SS        | ELISA     | Q3,Q3,NA  | 1.1  | 0.7  | 1.7  | 1.1  | 0.7  | 1.8  | -    | -    | -    |
| <b>endometrial cancer</b> |      |           |           |           |      |      |      |      |      |      |      |      |      |
| Petridou                  | 2003 | PS        | ELISA     | Q3,Q3,NA  | 0.46 | 0.26 | 0.79 | 1.52 | 0.87 | 2.65 | -    | -    | -    |
| Oh                        | 2004 | PS        | ELISA     | Q4,Q4,NA  | 0.42 | 0.14 | 1.25 | 0.23 | 0.09 | 0.6  | -    | -    | -    |
| Lacey Jr                  | 2004 | SS        | ELISA     | Q3,Q3,NA  | 0.63 | 0.3  | 1.32 | 0.4  | 0.21 | 0.77 | -    | -    | -    |
| Augustin                  | 2004 | PS        | ELISA     | Q3,Q3,NA  | 1.9  | 0.6  | 5.9  | 0.6  | 0.2  | 1.8  | -    | -    | -    |
| Lukanova                  | 2004 | SS        | IRMA      | Q5,Q5,NA  | 0.9  | 0.44 | 1.82 | 2.41 | 1.07 | 5.45 | -    | -    | -    |
| <b>lung cancer</b>        |      |           |           |           |      |      |      |      |      |      |      |      |      |
| Yu                        | 1999 | PS        | ELISA     | Q4,Q4,NA  | 2.75 | 1.37 | 5.53 | 0.48 | 0.25 | 0.92 | -    | -    | -    |
| London                    | 2001 | SS        | RIA, IMRA | Q4,Q4,NA  | 0.86 | 0.47 | 1.57 | 0.5  | 0.25 | 1.02 | -    | -    | -    |
| Lukanova                  | 2001 | SS        | IRMA      | Q4,Q4,NA  | 0.54 | 0.14 | 2.07 | 0.9  | 0.28 | 2.85 | -    | -    | -    |
| Spitz                     | 2002 | SS        | ELISA     | Q4,Q4,Q4  | 0.64 | 0.31 | 1.33 | 2.35 | 1.13 | 4.92 | 0.86 | 0.49 | 1.5  |
| Ahn                       | 2006 | SS        | ELISA     | Q4,Q4,Q4  | 0.76 | 0.39 | 1.49 | 0.71 | 0.35 | 1.47 | 0.8  | 0.47 | 1.36 |

| <b>pancreatic Cancer</b> |      |           |       |          |      |      |      |      |      |      |      |      |      |
|--------------------------|------|-----------|-------|----------|------|------|------|------|------|------|------|------|------|
| Stolzenberg-Solomon      | 2004 | SS and PS | ELISA | Q3,Q3,Q3 | 0.83 | 0.4  | 1.73 | 0.78 | 0.41 | 1.47 | 0.85 | 0.5  | 1.46 |
| Lin                      | 2004 | SS        | IMRA  | Q4,Q4,NA | 1.74 | 0.46 | 6.52 | 2.03 | 0.68 | 6.07 | -    | -    | -    |
| Wolpin                   | 2007 | PS        | ELISA | Q5,Q5,Q5 | 0.78 | 0.44 | 1.38 | 1.38 | 0.76 | 2.51 | 0.84 | 0.54 | 1.31 |
| <b>other cancer site</b> |      |           |       |          |      |      |      |      |      |      |      |      |      |
| Zhao                     | 2003 | PS        | ELISA | Q4,Q4,Q4 | 3.88 | 1.74 | 8.65 | 0.3  | 0.14 | 2.63 | 4.3  | 1.99 | 9.28 |
| Morris                   | 2006 | SS        | ELISA | Q4,Q4,NA | 1.03 | 0.84 | 1.27 | 0.91 | 0.71 | 1.15 | -    | -    | -    |
| Serrano                  | 2006 | SS        | ELISA | Q4,Q4,Q4 | 0.3  | 0.08 | 1.05 | 1.52 | 0.43 | 5.4  | 0.26 | 0.08 | 0.89 |
| Pham                     | 2007 | SS        | IMRA  | Q4,Q4,Q4 | 0.91 | 0.49 | 1.68 | 0.85 | 0.51 | 1.52 | 1.38 | 0.74 | 2.59 |
| Schaffer                 | 2007 | PS        | ELISA | Q4,Q4,NA | 0.4  | 0.19 | 0.87 | 1.15 | 0.57 | 2.31 | -    | -    | -    |

Abbreviation: IGF1 =insulin-like growth factor. IGFBP=insulin-like growth factor binding protein. SS=serum samples, PS=plasma samples, SS and PS=serum and plasma sample, IRMA=immunoradiometric assay. RIA=radioimmunassay. ELISA=enzyme-linked immunosorbent assay. CLIA: Chemiluminescent Immunoassay.

Category : in the order of IGF1, IGFBP3 and IGF molar ratio. Q5: quintiles; Q4: quartiles; Q3: tertiles; NA=not available. OR=odds ratio. Lower=OR lower, Upper=OR upper.
