# Supplementary material
Source: PubMed Central journal article supplement (PMC2987015)
Supplement: ejhg200986x4.pdf [file ejhg200986x4.pdf]

Review: IGF1, IGFBP3 and cancer risks  
 Comparison: IGFBP3 polymorphism and cancer  
 Outcome: IGFBP3 polymorphism and cancer risk (recessive model)

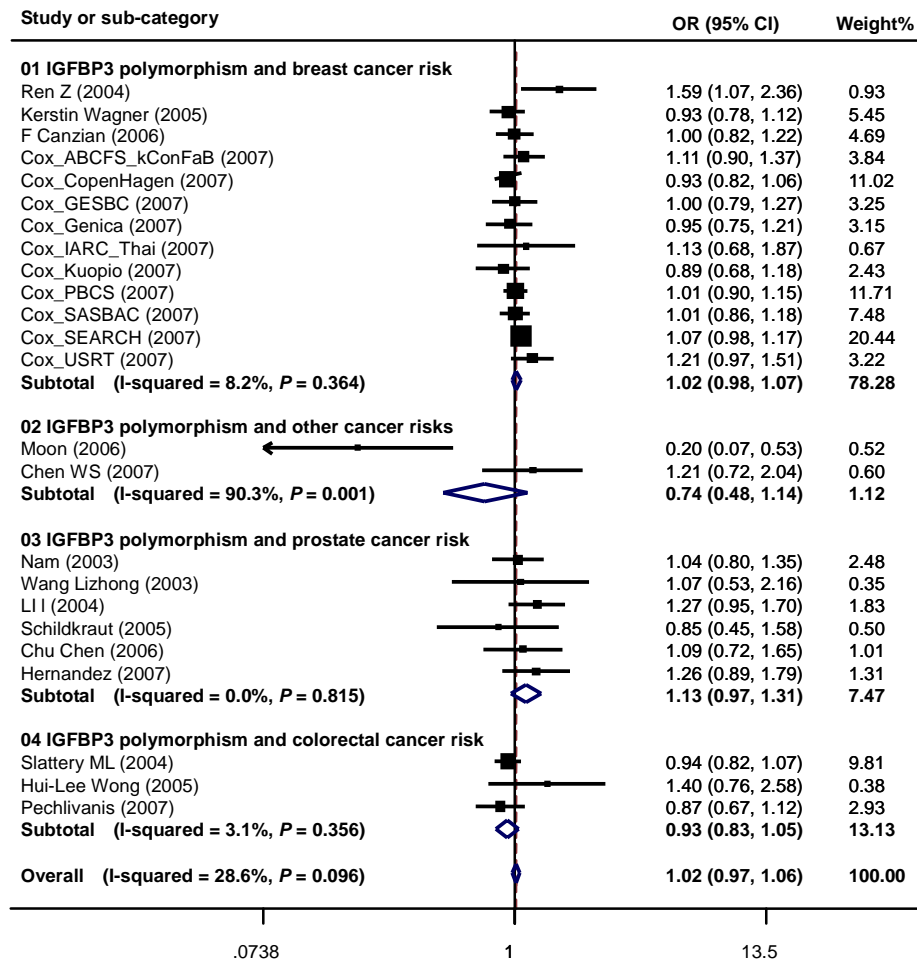

**Supplemental Figure1 The association between IGFBP3 polymorphism in the promoter region (A-202C) and cancer risks in recessive model**
